# Supplementary material
Source: publisher figshare collection journal article supplement (https://acs.figshare.com/ndownloader/files/9254536)
Supplement: Supplementary file 1 [file 9254536]

 
data_373 
 
_audit_creation_method            SHELXL-97 
_chemical_name_systematic 
; 
 ? 
; 
_chemical_name_common             ? 
_chemical_melting_point           ? 
_chemical_formula_moiety          'C22 H28 I N O5' 
_chemical_formula_sum 
 'C22 H28 I N O5' 
_chemical_formula_weight          513.35 
_chemical_absolute_configuration  ad
 
loop_ 
 _atom_type_symbol 
 _atom_type_description 
 _atom_type_scat_dispersion_real 
 _atom_type_scat_dispersion_imag 
 _atom_type_scat_source 
 'C'  'C'   0.0033   0.0016 
 'International Tables Vol C Tables 4.2.6.8 and 6.1.1.4' 
 'H'  'H'   0.0000   0.0000 
 'International Tables Vol C Tables 4.2.6.8 and 6.1.1.4' 
 'N'  'N'   0.0061   0.0033 
 'International Tables Vol C Tables 4.2.6.8 and 6.1.1.4' 
 'O'  'O'   0.0106   0.0060 
 'International Tables Vol C Tables 4.2.6.8 and 6.1.1.4' 
 'I'  'I'  -0.4742   1.8119 
 'International Tables Vol C Tables 4.2.6.8 and 6.1.1.4' 
 
_symmetry_cell_setting            monoclinic
_symmetry_space_group_name_H-M    'C 2'
 
loop_ 
 _symmetry_equiv_pos_as_xyz 
 'x, y, z' 
 '-x, y, -z' 
 'x+1/2, y+1/2, z' 
 '-x+1/2, y+1/2, -z' 
 
_cell_length_a                    26.6787(2) 
_cell_length_b                    6.1565(3) 
_cell_length_c                    17.0060(3) 
_cell_angle_alpha                 90.00 
_cell_angle_beta                  123.668(4) 
_cell_angle_gamma                 90.00 
_cell_volume                      2324.67(12) 
_cell_formula_units_Z             4 
_cell_measurement_temperature     296(2) 
_cell_measurement_reflns_used     3793
_cell_measurement_theta_min       3.52
_cell_measurement_theta_max       24.96
 
_exptl_crystal_description        column 
_exptl_crystal_colour             colorless
_exptl_crystal_size_max           0.35 
_exptl_crystal_size_mid           0.11 
_exptl_crystal_size_min           0.10 
_exptl_crystal_density_meas       ? 
_exptl_crystal_density_diffrn     1.467 
_exptl_crystal_density_method     'not measured' 
_exptl_crystal_F_000              1040 
_exptl_absorpt_coefficient_mu     1.408 
_exptl_absorpt_correction_type    multi-scan 
_exptl_absorpt_correction_T_min   0.6385 
_exptl_absorpt_correction_T_max   0.8720 
_exptl_absorpt_process_details    SADABS
 
_exptl_special_details 
; 
 ? 
; 
 
_diffrn_ambient_temperature       296(2) 
_diffrn_radiation_wavelength      0.71073 
_diffrn_radiation_type            MoK\a 
_diffrn_radiation_source          'fine-focus sealed tube' 
_diffrn_radiation_monochromator   graphite 
_diffrn_measurement_device_type   'Bruker APEX-II CCD'
_diffrn_measurement_method        '\f and \w scans'
_diffrn_detector_area_resol_mean  ?
_diffrn_standards_number          0
_diffrn_standards_interval_count  ? 
_diffrn_standards_interval_time   ? 
_diffrn_standards_decay_%         ? 
_diffrn_reflns_number             9886 
_diffrn_reflns_av_R_equivalents   0.0247 
_diffrn_reflns_av_sigmaI/netI     0.0399 
_diffrn_reflns_limit_h_min        -32 
_diffrn_reflns_limit_h_max        34 
_diffrn_reflns_limit_k_min        -7 
_diffrn_reflns_limit_k_max        7 
_diffrn_reflns_limit_l_min        -22 
_diffrn_reflns_limit_l_max        19 
_diffrn_reflns_theta_min          3.52 
_diffrn_reflns_theta_max          27.49 
_reflns_number_total              4772 
_reflns_number_gt                 4071 
_reflns_threshold_expression      >2sigma(I) 
 
_computing_data_collection      'Bruker APEX2'
_computing_cell_refinement      'Bruker SAINT'
_computing_data_reduction       'Bruker SAINT'  
_computing_structure_solution   'SHELXS-97 (Sheldrick, 2008)'
_computing_structure_refinement 'SHELXL-97 (Sheldrick, 2008)'
_computing_molecular_graphics   'Bruker SHELXTL'
_computing_publication_material 'Bruker SHELXTL'

 
_refine_special_details 
; 
 Refinement of F^2^ against ALL reflections.  The weighted R-factor wR and 
 goodness of fit S are based on F^2^, conventional R-factors R are based 
 on F, with F set to zero for negative F^2^. The threshold expression of 
 F^2^ > 2sigma(F^2^) is used only for calculating R-factors(gt) etc. and is 
 not relevant to the choice of reflections for refinement.  R-factors based 
 on F^2^ are statistically about twice as large as those based on F, and R- 
 factors based on ALL data will be even larger. 
; 
 
_refine_ls_structure_factor_coef  Fsqd  
_refine_ls_matrix_type            full 
_refine_ls_weighting_scheme       calc  
_refine_ls_weighting_details 
 'calc w=1/[\s^2^(Fo^2^)+(0.0282P)^2^+1.2387P] where P=(Fo^2^+2Fc^2^)/3' 
_atom_sites_solution_primary      direct 
_atom_sites_solution_secondary    difmap 
_atom_sites_solution_hydrogens    geom 
_refine_ls_hydrogen_treatment     constr
_refine_ls_extinction_method      none 
_refine_ls_extinction_coef        ? 
_refine_ls_abs_structure_details 
 'Flack H D (1983), Acta Cryst. A39, 876-881' 
_refine_ls_abs_structure_Flack    0.016(19) 
_refine_ls_number_reflns          4772 
_refine_ls_number_parameters      262 
_refine_ls_number_restraints      1 
_refine_ls_R_factor_all           0.0427 
_refine_ls_R_factor_gt            0.0338 
_refine_ls_wR_factor_ref          0.0757 
_refine_ls_wR_factor_gt           0.0709 
_refine_ls_goodness_of_fit_ref    1.022 
_refine_ls_restrained_S_all       1.022 
_refine_ls_shift/su_max           0.003 
_refine_ls_shift/su_mean          0.000 
 
loop_ 
 _atom_site_label 
 _atom_site_type_symbol 
 _atom_site_fract_x 
 _atom_site_fract_y 
 _atom_site_fract_z 
 _atom_site_U_iso_or_equiv 
 _atom_site_adp_type 
 _atom_site_occupancy 
 _atom_site_symmetry_multiplicity 
 _atom_site_calc_flag 
 _atom_site_refinement_flags 
 _atom_site_disorder_assembly 
 _atom_site_disorder_group 
I1 I 0.779843(11) 0.66876(7) 0.960854(18) 0.06869(11) Uani 1 1 d . . . 
O1 O 0.79430(12) 0.0635(4) 0.76419(19) 0.0550(7) Uani 1 1 d . . . 
O2 O 0.78053(12) 0.7325(4) 0.62488(19) 0.0471(7) Uani 1 1 d . . . 
O3 O 0.70821(10) 0.4975(4) 0.55078(16) 0.0474(6) Uani 1 1 d . . . 
O4 O 0.97353(14) 0.4123(5) 0.8473(3) 0.0785(11) Uani 1 1 d . . . 
O5 O 0.94739(15) 0.9675(6) 0.8043(4) 0.143(3) Uani 1 1 d . . . 
H5A H 0.9679 1.0781 0.8240 0.214 Uiso 1 1 calc R . . 
N1 N 0.89170(10) 0.6229(4) 0.79275(17) 0.0367(6) Uani 1 1 d . . . 
H1A H 0.8773 0.7500 0.7710 0.044 Uiso 1 1 calc R . . 
C1 C 0.76814(14) 0.1983(6) 0.7045(2) 0.0404(8) Uani 1 1 d . . . 
C2 C 0.80360(14) 0.3741(5) 0.6910(2) 0.0336(6) Uani 1 1 d . . . 
C3 C 0.76390(16) 0.5506(6) 0.6218(2) 0.0347(8) Uani 1 1 d . . . 
C4 C 0.68499(16) 0.2789(6) 0.5427(3) 0.0468(8) Uani 1 1 d . . . 
H4A H 0.7052 0.1806 0.5235 0.056 Uiso 1 1 calc R . . 
C5 C 0.70000(14) 0.2076(6) 0.6394(2) 0.0438(8) Uani 1 1 d . . . 
H5B H 0.6857 0.3204 0.6631 0.053 Uiso 1 1 calc R . . 
C6 C 0.85145(13) 0.4636(5) 0.7912(2) 0.0333(6) Uani 1 1 d . . . 
H6A H 0.8758 0.3409 0.8307 0.040 Uiso 1 1 calc R . . 
C7 C 0.82102(13) 0.5632(5) 0.8358(2) 0.0341(7) Uani 1 1 d . . . 
H7A H 0.7982 0.6881 0.8081 0.041 Uiso 1 1 calc R . . 
C8 C 0.82431(16) 0.4866(6) 0.9106(2) 0.0415(7) Uani 1 1 d . . . 
C9 C 0.8567(2) 0.2906(7) 0.9679(3) 0.0706(12) Uani 1 1 d . . . 
H9A H 0.8755 0.2175 0.9408 0.106 Uiso 1 1 calc R . . 
H9B H 0.8286 0.1943 0.9685 0.106 Uiso 1 1 calc R . . 
H9C H 0.8870 0.3337 1.0314 0.106 Uiso 1 1 calc R . . 
C10 C 0.83511(16) 0.2675(6) 0.6473(3) 0.0475(8) Uani 1 1 d . . . 
H10A H 0.8053 0.2131 0.5856 0.071 Uiso 1 1 calc R . . 
H10B H 0.8599 0.1498 0.6868 0.071 Uiso 1 1 calc R . . 
H10C H 0.8597 0.3733 0.6424 0.071 Uiso 1 1 calc R . . 
C11 C 0.94947(16) 0.5892(6) 0.8252(2) 0.0448(8) Uani 1 1 d . . . 
C12 C 0.98449(17) 0.7886(7) 0.8316(3) 0.0573(10) Uani 1 1 d . . . 
H12A H 0.9955 0.7708 0.7857 0.069 Uiso 1 1 calc R . . 
C13 C 1.0415(2) 0.8114(10) 0.9265(4) 0.0978(19) Uani 1 1 d . . . 
H13A H 1.0625 0.9391 0.9277 0.147 Uiso 1 1 calc R . . 
H13B H 1.0663 0.6859 0.9395 0.147 Uiso 1 1 calc R . . 
H13C H 1.0324 0.8238 0.9736 0.147 Uiso 1 1 calc R . . 
C14 C 0.61859(16) 0.2919(7) 0.4628(3) 0.0548(9) Uani 1 1 d . . . 
H14A H 0.6156 0.3425 0.4062 0.066 Uiso 1 1 calc R . . 
H14B H 0.6016 0.1468 0.4500 0.066 Uiso 1 1 calc R . . 
C15 C 0.58131(18) 0.4384(8) 0.4818(3) 0.0671(12) Uani 1 1 d . . . 
H15A H 0.6005 0.5797 0.5018 0.081 Uiso 1 1 calc R . . 
H15B H 0.5795 0.3780 0.5328 0.081 Uiso 1 1 calc R . . 
C16 C 0.51760(19) 0.4658(9) 0.3946(3) 0.0684(12) Uani 1 1 d . . . 
C17 C 0.5008(2) 0.6554(17) 0.3421(4) 0.1073(17) Uani 1 1 d . . . 
H17A H 0.5284 0.7686 0.3619 0.129 Uiso 1 1 calc R . . 
C18 C 0.4448(4) 0.680(2) 0.2620(5) 0.148(3) Uani 1 1 d . . . 
H18A H 0.4351 0.8051 0.2259 0.178 Uiso 1 1 calc R . . 
C19 C 0.4042(3) 0.524(2) 0.2354(6) 0.139(4) Uani 1 1 d . . . 
H19A H 0.3650 0.5475 0.1841 0.167 Uiso 1 1 calc R . . 
C20 C 0.4185(3) 0.3251(18) 0.2823(5) 0.119(3) Uani 1 1 d . . . 
H20A H 0.3906 0.2126 0.2605 0.143 Uiso 1 1 calc R . . 
C21 C 0.4770(2) 0.3015(11) 0.3640(4) 0.0850(16) Uani 1 1 d . . . 
H21A H 0.4880 0.1716 0.3975 0.102 Uiso 1 1 calc R . . 
C22 C 0.67103(19) -0.0057(8) 0.6381(4) 0.0689(12) Uani 1 1 d . . . 
H22A H 0.6820 -0.0395 0.7009 0.103 Uiso 1 1 calc R . . 
H22B H 0.6848 -0.1193 0.6159 0.103 Uiso 1 1 calc R . . 
H22C H 0.6280 0.0069 0.5969 0.103 Uiso 1 1 calc R . . 
 
loop_ 
 _atom_site_aniso_label 
 _atom_site_aniso_U_11 
 _atom_site_aniso_U_22 
 _atom_site_aniso_U_33 
 _atom_site_aniso_U_23 
 _atom_site_aniso_U_13 
 _atom_site_aniso_U_12 
I1 0.07707(17) 0.0798(2) 0.07546(17) -0.0162(2) 0.05865(15) -0.0161(2) 
O1 0.0638(16) 0.0267(12) 0.0541(16) 0.0067(11) 0.0198(14) -0.0062(11) 
O2 0.0509(14) 0.0336(16) 0.0454(14) 0.0072(10) 0.0195(12) 0.0003(11) 
O3 0.0413(12) 0.0483(15) 0.0364(12) 0.0062(10) 0.0115(11) -0.0077(11) 
O4 0.0464(17) 0.0414(18) 0.127(3) -0.0046(19) 0.0354(19) 0.0085(14) 
O5 0.0453(19) 0.048(2) 0.262(6) 0.044(3) 0.040(3) -0.0009(17) 
N1 0.0338(12) 0.0273(18) 0.0402(13) 0.0006(11) 0.0150(11) -0.0012(10) 
C1 0.0504(16) 0.028(2) 0.0421(16) -0.0091(16) 0.0250(14) -0.0055(16) 
C2 0.0394(16) 0.0269(16) 0.0325(15) -0.0004(12) 0.0185(13) 0.0008(12) 
C3 0.0388(18) 0.032(2) 0.0320(17) 0.0004(13) 0.0189(15) -0.0023(14) 
C4 0.0421(18) 0.048(2) 0.0448(19) -0.0103(15) 0.0207(16) -0.0058(15) 
C5 0.0460(16) 0.034(2) 0.0540(18) -0.0022(15) 0.0296(15) -0.0050(15) 
C6 0.0356(15) 0.0247(15) 0.0331(16) 0.0025(12) 0.0149(13) -0.0004(12) 
C7 0.0342(15) 0.0271(15) 0.0341(16) -0.0014(12) 0.0147(13) -0.0017(12) 
C8 0.0496(18) 0.0347(18) 0.0389(18) -0.0022(14) 0.0237(16) -0.0067(15) 
C9 0.101(3) 0.054(3) 0.051(2) 0.020(2) 0.039(2) 0.005(2) 
C10 0.0490(19) 0.045(2) 0.049(2) -0.0095(15) 0.0270(17) 0.0014(15) 
C11 0.0374(17) 0.046(2) 0.0429(19) -0.0030(14) 0.0172(15) -0.0017(14) 
C12 0.039(2) 0.049(2) 0.074(3) 0.007(2) 0.026(2) -0.0040(18) 
C13 0.051(3) 0.091(4) 0.095(4) -0.005(3) 0.006(3) -0.024(3) 
C14 0.0442(19) 0.065(2) 0.045(2) -0.0133(18) 0.0180(17) -0.0086(18) 
C15 0.048(2) 0.080(3) 0.056(2) -0.015(2) 0.0182(19) 0.001(2) 
C16 0.049(2) 0.094(4) 0.058(3) -0.003(2) 0.026(2) 0.010(2) 
C17 0.089(3) 0.090(4) 0.102(4) 0.000(6) 0.027(3) 0.012(5) 
C18 0.113(5) 0.146(7) 0.107(5) 0.031(7) 0.011(4) 0.035(8) 
C19 0.057(4) 0.220(11) 0.092(5) -0.005(6) 0.011(4) 0.043(5) 
C20 0.060(3) 0.210(9) 0.085(4) -0.044(5) 0.040(3) -0.028(4) 
C21 0.054(3) 0.130(5) 0.068(3) -0.009(3) 0.032(2) -0.014(3) 
C22 0.052(2) 0.053(3) 0.098(4) 0.009(2) 0.039(2) -0.0086(19) 
 
_geom_special_details 
; 
 All esds (except the esd in the dihedral angle between two l.s. planes) 
 are estimated using the full covariance matrix.  The cell esds are taken 
 into account individually in the estimation of esds in distances, angles 
 and torsion angles; correlations between esds in cell parameters are only 
 used when they are defined by crystal symmetry.  An approximate (isotropic) 
 treatment of cell esds is used for estimating esds involving l.s. planes. 
; 
 
loop_ 
 _geom_bond_atom_site_label_1 
 _geom_bond_atom_site_label_2 
 _geom_bond_distance 
 _geom_bond_site_symmetry_2 
 _geom_bond_publ_flag 
I1 C8 2.126(4) . ? 
O1 C1 1.192(4) . ? 
O2 C3 1.195(4) . ? 
O3 C3 1.336(4) . ? 
O3 C4 1.456(5) . ? 
O4 C11 1.213(5) . ? 
O5 C12 1.378(6) . ? 
O5 H5A 0.8200 . ? 
N1 C11 1.334(4) . ? 
N1 C6 1.444(4) . ? 
N1 H1A 0.8600 . ? 
C1 C5 1.517(5) . ? 
C1 C2 1.537(5) . ? 
C2 C3 1.518(5) . ? 
C2 C10 1.543(5) . ? 
C2 C6 1.558(4) . ? 
C4 C14 1.524(5) . ? 
C4 C5 1.525(5) . ? 
C4 H4A 0.9800 . ? 
C5 C22 1.517(5) . ? 
C5 H5B 0.9800 . ? 
C6 C7 1.514(4) . ? 
C6 H6A 0.9800 . ? 
C7 C8 1.313(5) . ? 
C7 H7A 0.9300 . ? 
C8 C9 1.490(5) . ? 
C9 H9A 0.9600 . ? 
C9 H9B 0.9600 . ? 
C9 H9C 0.9600 . ? 
C10 H10A 0.9600 . ? 
C10 H10B 0.9600 . ? 
C10 H10C 0.9600 . ? 
C11 C12 1.510(5) . ? 
C12 C13 1.489(6) . ? 
C12 H12A 0.9800 . ? 
C13 H13A 0.9600 . ? 
C13 H13B 0.9600 . ? 
C13 H13C 0.9600 . ? 
C14 C15 1.505(6) . ? 
C14 H14A 0.9700 . ? 
C14 H14B 0.9700 . ? 
C15 C16 1.523(6) . ? 
C15 H15A 0.9700 . ? 
C15 H15B 0.9700 . ? 
C16 C21 1.357(7) . ? 
C16 C17 1.385(10) . ? 
C17 C18 1.362(8) . ? 
C17 H17A 0.9300 . ? 
C18 C19 1.326(15) . ? 
C18 H18A 0.9300 . ? 
C19 C20 1.391(12) . ? 
C19 H19A 0.9300 . ? 
C20 C21 1.409(8) . ? 
C20 H20A 0.9300 . ? 
C21 H21A 0.9300 . ? 
C22 H22A 0.9600 . ? 
C22 H22B 0.9600 . ? 
C22 H22C 0.9600 . ? 
 
loop_ 
 _geom_angle_atom_site_label_1 
 _geom_angle_atom_site_label_2 
 _geom_angle_atom_site_label_3 
 _geom_angle 
 _geom_angle_site_symmetry_1 
 _geom_angle_site_symmetry_3 
 _geom_angle_publ_flag 
C3 O3 C4 120.9(3) . . ? 
C12 O5 H5A 109.5 . . ? 
C11 N1 C6 125.4(3) . . ? 
C11 N1 H1A 117.3 . . ? 
C6 N1 H1A 117.3 . . ? 
O1 C1 C5 123.1(3) . . ? 
O1 C1 C2 120.0(3) . . ? 
C5 C1 C2 116.9(3) . . ? 
C3 C2 C1 113.4(3) . . ? 
C3 C2 C10 105.3(3) . . ? 
C1 C2 C10 108.5(3) . . ? 
C3 C2 C6 113.0(3) . . ? 
C1 C2 C6 106.5(2) . . ? 
C10 C2 C6 110.0(3) . . ? 
O2 C3 O3 118.0(3) . . ? 
O2 C3 C2 123.7(3) . . ? 
O3 C3 C2 118.3(3) . . ? 
O3 C4 C14 105.0(3) . . ? 
O3 C4 C5 108.7(3) . . ? 
C14 C4 C5 117.3(3) . . ? 
O3 C4 H4A 108.5 . . ? 
C14 C4 H4A 108.5 . . ? 
C5 C4 H4A 108.5 . . ? 
C1 C5 C22 111.9(3) . . ? 
C1 C5 C4 106.9(3) . . ? 
C22 C5 C4 114.0(3) . . ? 
C1 C5 H5B 108.0 . . ? 
C22 C5 H5B 108.0 . . ? 
C4 C5 H5B 108.0 . . ? 
N1 C6 C7 108.4(2) . . ? 
N1 C6 C2 114.2(2) . . ? 
C7 C6 C2 110.5(2) . . ? 
N1 C6 H6A 107.8 . . ? 
C7 C6 H6A 107.8 . . ? 
C2 C6 H6A 107.8 . . ? 
C8 C7 C6 125.0(3) . . ? 
C8 C7 H7A 117.5 . . ? 
C6 C7 H7A 117.5 . . ? 
C7 C8 C9 128.9(4) . . ? 
C7 C8 I1 116.6(3) . . ? 
C9 C8 I1 114.5(3) . . ? 
C8 C9 H9A 109.5 . . ? 
C8 C9 H9B 109.5 . . ? 
H9A C9 H9B 109.5 . . ? 
C8 C9 H9C 109.5 . . ? 
H9A C9 H9C 109.5 . . ? 
H9B C9 H9C 109.5 . . ? 
C2 C10 H10A 109.5 . . ? 
C2 C10 H10B 109.5 . . ? 
H10A C10 H10B 109.5 . . ? 
C2 C10 H10C 109.5 . . ? 
H10A C10 H10C 109.5 . . ? 
H10B C10 H10C 109.5 . . ? 
O4 C11 N1 124.0(3) . . ? 
O4 C11 C12 120.5(3) . . ? 
N1 C11 C12 115.5(3) . . ? 
O5 C12 C13 113.7(5) . . ? 
O5 C12 C11 109.0(3) . . ? 
C13 C12 C11 112.0(4) . . ? 
O5 C12 H12A 107.3 . . ? 
C13 C12 H12A 107.3 . . ? 
C11 C12 H12A 107.3 . . ? 
C12 C13 H13A 109.5 . . ? 
C12 C13 H13B 109.5 . . ? 
H13A C13 H13B 109.5 . . ? 
C12 C13 H13C 109.5 . . ? 
H13A C13 H13C 109.5 . . ? 
H13B C13 H13C 109.5 . . ? 
C15 C14 C4 114.8(3) . . ? 
C15 C14 H14A 108.6 . . ? 
C4 C14 H14A 108.6 . . ? 
C15 C14 H14B 108.6 . . ? 
C4 C14 H14B 108.6 . . ? 
H14A C14 H14B 107.5 . . ? 
C14 C15 C16 111.8(3) . . ? 
C14 C15 H15A 109.3 . . ? 
C16 C15 H15A 109.3 . . ? 
C14 C15 H15B 109.3 . . ? 
C16 C15 H15B 109.3 . . ? 
H15A C15 H15B 107.9 . . ? 
C21 C16 C17 118.5(5) . . ? 
C21 C16 C15 120.9(5) . . ? 
C17 C16 C15 120.5(5) . . ? 
C18 C17 C16 121.3(9) . . ? 
C18 C17 H17A 119.3 . . ? 
C16 C17 H17A 119.3 . . ? 
C19 C18 C17 119.9(11) . . ? 
C19 C18 H18A 120.1 . . ? 
C17 C18 H18A 120.1 . . ? 
C18 C19 C20 121.9(7) . . ? 
C18 C19 H19A 119.1 . . ? 
C20 C19 H19A 119.1 . . ? 
C19 C20 C21 117.2(7) . . ? 
C19 C20 H20A 121.4 . . ? 
C21 C20 H20A 121.4 . . ? 
C16 C21 C20 120.9(7) . . ? 
C16 C21 H21A 119.5 . . ? 
C20 C21 H21A 119.5 . . ? 
C5 C22 H22A 109.5 . . ? 
C5 C22 H22B 109.5 . . ? 
H22A C22 H22B 109.5 . . ? 
C5 C22 H22C 109.5 . . ? 
H22A C22 H22C 109.5 . . ? 
H22B C22 H22C 109.5 . . ? 
 
loop_ 
 _geom_torsion_atom_site_label_1 
 _geom_torsion_atom_site_label_2 
 _geom_torsion_atom_site_label_3 
 _geom_torsion_atom_site_label_4 
 _geom_torsion 
 _geom_torsion_site_symmetry_1 
 _geom_torsion_site_symmetry_2 
 _geom_torsion_site_symmetry_3 
 _geom_torsion_site_symmetry_4 
 _geom_torsion_publ_flag 
O1 C1 C2 C3 -172.1(3) . . . . ? 
C5 C1 C2 C3 7.8(4) . . . . ? 
O1 C1 C2 C10 71.3(4) . . . . ? 
C5 C1 C2 C10 -108.8(3) . . . . ? 
O1 C1 C2 C6 -47.1(4) . . . . ? 
C5 C1 C2 C6 132.7(3) . . . . ? 
C4 O3 C3 O2 -179.9(3) . . . . ? 
C4 O3 C3 C2 3.3(5) . . . . ? 
C1 C2 C3 O2 152.6(4) . . . . ? 
C10 C2 C3 O2 -88.9(4) . . . . ? 
C6 C2 C3 O2 31.2(5) . . . . ? 
C1 C2 C3 O3 -30.9(4) . . . . ? 
C10 C2 C3 O3 87.6(4) . . . . ? 
C6 C2 C3 O3 -152.2(3) . . . . ? 
C3 O3 C4 C14 172.2(3) . . . . ? 
C3 O3 C4 C5 45.9(4) . . . . ? 
O1 C1 C5 C22 -17.6(5) . . . . ? 
C2 C1 C5 C22 162.6(3) . . . . ? 
O1 C1 C5 C4 -143.0(4) . . . . ? 
C2 C1 C5 C4 37.2(4) . . . . ? 
O3 C4 C5 C1 -63.6(4) . . . . ? 
C14 C4 C5 C1 177.5(3) . . . . ? 
O3 C4 C5 C22 172.2(3) . . . . ? 
C14 C4 C5 C22 53.4(5) . . . . ? 
C11 N1 C6 C7 129.4(3) . . . . ? 
C11 N1 C6 C2 -107.0(3) . . . . ? 
C3 C2 C6 N1 -58.4(3) . . . . ? 
C1 C2 C6 N1 176.4(3) . . . . ? 
C10 C2 C6 N1 59.0(3) . . . . ? 
C3 C2 C6 C7 64.1(3) . . . . ? 
C1 C2 C6 C7 -61.0(3) . . . . ? 
C10 C2 C6 C7 -178.5(3) . . . . ? 
N1 C6 C7 C8 -120.6(3) . . . . ? 
C2 C6 C7 C8 113.6(3) . . . . ? 
C6 C7 C8 C9 -0.6(6) . . . . ? 
C6 C7 C8 I1 177.5(2) . . . . ? 
C6 N1 C11 O4 9.0(6) . . . . ? 
C6 N1 C11 C12 -172.0(3) . . . . ? 
O4 C11 C12 O5 -178.9(5) . . . . ? 
N1 C11 C12 O5 2.1(6) . . . . ? 
O4 C11 C12 C13 -52.2(6) . . . . ? 
N1 C11 C12 C13 128.7(4) . . . . ? 
O3 C4 C14 C15 -63.9(4) . . . . ? 
C5 C4 C14 C15 56.9(5) . . . . ? 
C4 C14 C15 C16 172.8(4) . . . . ? 
C14 C15 C16 C21 72.6(6) . . . . ? 
C14 C15 C16 C17 -104.0(6) . . . . ? 
C21 C16 C17 C18 0.7(10) . . . . ? 
C15 C16 C17 C18 177.4(6) . . . . ? 
C16 C17 C18 C19 3.2(13) . . . . ? 
C17 C18 C19 C20 -6.1(15) . . . . ? 
C18 C19 C20 C21 4.8(12) . . . . ? 
C17 C16 C21 C20 -1.9(8) . . . . ? 
C15 C16 C21 C20 -178.6(5) . . . . ? 
C19 C20 C21 C16 -0.7(9) . . . . ? 
 
loop_ 
 _geom_hbond_atom_site_label_D 
 _geom_hbond_atom_site_label_H 
 _geom_hbond_atom_site_label_A 
 _geom_hbond_distance_DH 
 _geom_hbond_distance_HA 
 _geom_hbond_distance_DA 
 _geom_hbond_angle_DHA 
 _geom_hbond_site_symmetry_A 
O5 H5A O4  0.82 2.08 2.820(5) 149.1 1_565 
N1 H1A O2  0.86 2.39 2.831(3) 111.9 . 
 
_diffrn_measured_fraction_theta_max    0.995 
_diffrn_reflns_theta_full              27.49 
_diffrn_measured_fraction_theta_full   0.995 
_refine_diff_density_max    0.507 
_refine_diff_density_min   -0.427 
_refine_diff_density_rms    0.052 
